# Supplementary material
Source: PubMed Central journal article supplement (PMC7539907)
Supplement: NIHMS1633156-supplement-Supplementary_Material.pdf [file NIHMS1633156-supplement-Supplementary_Material.pdf]

**Supplementary Table S1** ICD-9 codes

- 740 Anencephalus and similar anomalies
- 741 Spina bifida
- 742 Other congenital anomalies of nervous system
- 743 Congenital anomalies of eye
- 744 Congenital anomalies of ear, face, and neck
- 745 Bulbus cordis anomalies and anomalies of cardiac septal closure
- 746 Other congenital anomalies of heart
- 747 Other congenital anomalies of circulatory system
- 748 Congenital anomalies of respiratory system
- 749 Cleft palate and cleft lip
- 750 Other congenital anomalies of upper alimentary tract
- 751 Other congenital anomalies of digestive system
- 752 Congenital anomalies of genital organs
- 753 Congenital anomalies of urinary system
- 754 Certain congenital musculoskeletal deformities
- 755 Other congenital anomalies of limbs
- 756 Other congenital musculoskeletal anomalies
- 757 Congenital anomalies of the integument
- 758 Chromosomal anomalies
- 759 Other and unspecified congenital anomalies

Abbreviation: ICD, International Classification of Diseases.

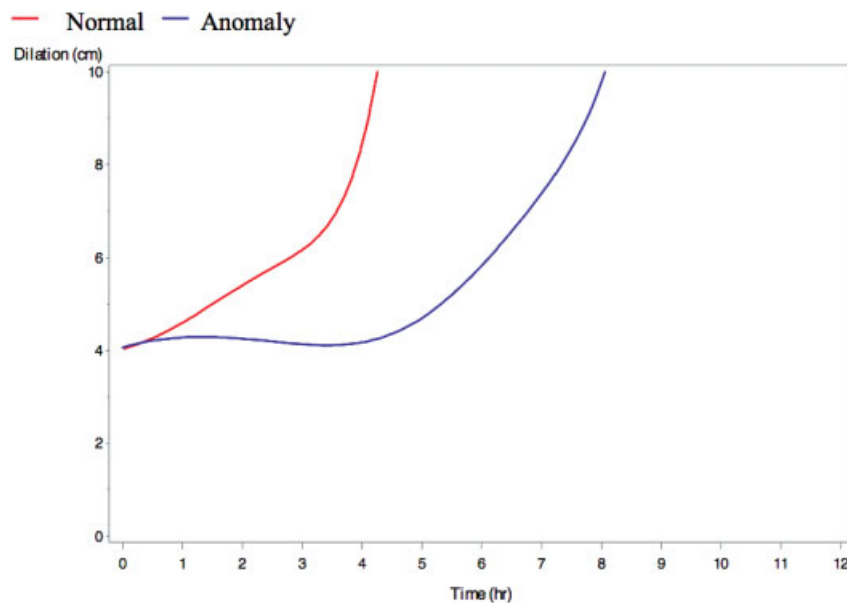

**Supplementary Fig. S1** Labor curves in induced/augmented preterm nulliparas.

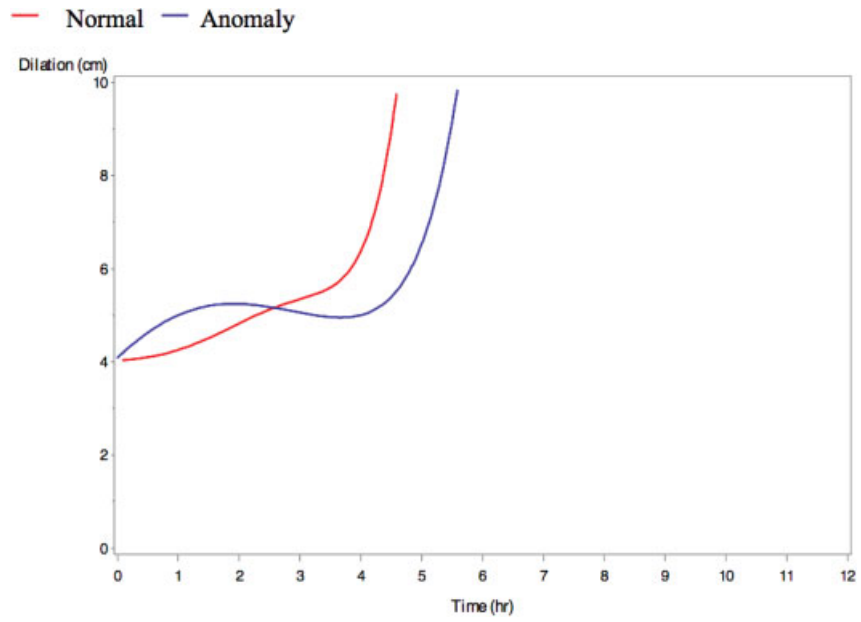

**Supplementary Fig. S2** Labor curves in induced/augmented preterm multiparas.

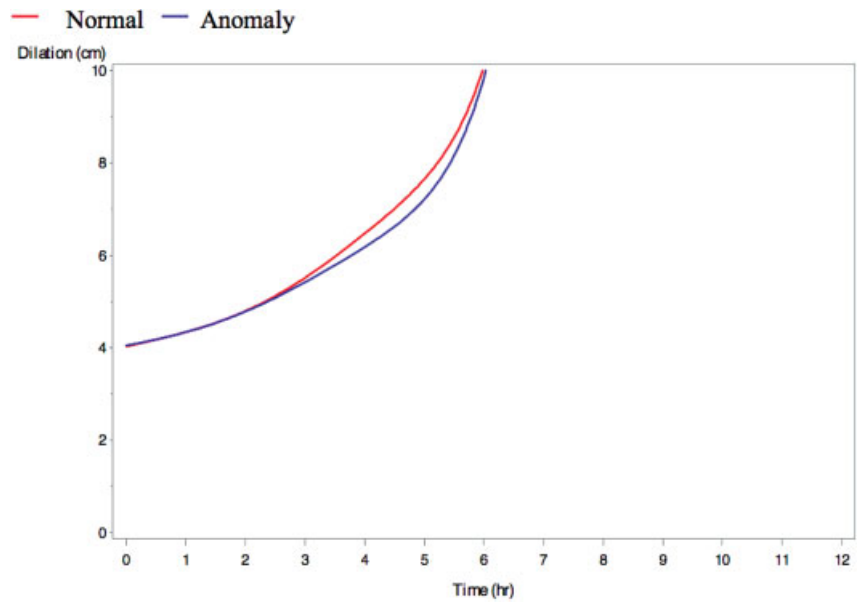

**Supplementary Fig. S3** Labor curves in induced/augmented term nulliparas.

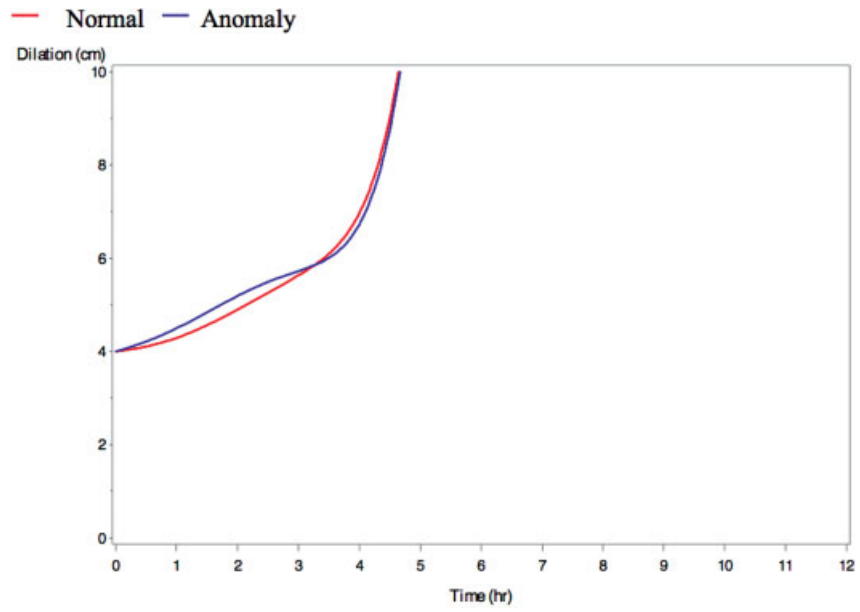

**Supplementary Fig. S4** Labor curves in induced/augmented term multiparas.
